# Supplementary material
Source: publisher figshare collection journal article supplement (https://tandf.figshare.com/ndownloader/files/22045101)
Supplement: Supplementary file 1 [file 22045101]

## Supplementary Material

DOI: 10.1080/15627020.2019.1681295

*African Zoology* 2020, 55(1)

### Special Issue: North-West University Department of Zoology Centenary Special Issue

#### *Xenopus laevis* as UberXL for nematodes

Anneke L Schoeman, Tracy-Lee Joubert, Louis H du Preez and Roman Svitin

**Supplementary Table S1:** Detailed information on 28 collection localities in southern Africa, where full parasitological surveys of *Xenopus laevis* were conducted, including a map of localities (Supplementary Figure S1) for reference.

| Site                                                               | Collection date | Coordinates               | Sample size | Habitat                                       |
|--------------------------------------------------------------------|-----------------|---------------------------|-------------|-----------------------------------------------|
| 7-Fontein Farm, <b>Vanrhynsdorp</b> , Western Cape                 | November 2017   | 31.73605° S, 18.82546° E  | 7           | Rocky pools in mountain stream                |
| Adelaide Golf Club, <b>Adelaide</b> , Eastern Cape                 | November 2017   | 32.6879° S, 26.2951° E    | 4           | Urban recreational dam in informal settlement |
| Bald Hills Farm, <b>Ugie</b> , Eastern Cape                        | December 2017   | 31.30493° S, 28.26462° E  | 6           | Fountain and dam on farm                      |
| Bloemendal Wine Estate, <b>Cape Town</b> , Western Cape            | July 2017       | 33.83921° S, 18.60027° E  | 5           | Dam on farm                                   |
| Burgundy Estate, <b>Cape Town</b> , Western Cape                   | June 2017       | 33.8355° S, 18.55281° E   | 14          | Urban recreational dam                        |
| Crimson Creek Cherry Farm, <b>Dullstroom</b> , Mpumalanga Province | May 2017        | 25.39811° S, 30.03804° E  | 10          | Vegetated dam in mountain stream on farm      |
| Debshan, <b>Zimbabwe</b>                                           | November 2017   | 19.682545° S, 29.15468° E | 1           | Pan in vlei on farm                           |
| GaMamadi Guest Farm, <b>Victoria West</b> , Northern Cape          | November 2017   | 31.85263° S, 23.26454° E  | 2           | Stagnant pool in mountain stream on farm      |
| George Botanical Gardens, <b>George</b> , Western Cape             | February 2018   | 33.94552° S, 22.46366° E  | 3           | Vegetated pond in urban area                  |
| Groothoek Farm, <b>Laingsburg</b> , Western Cape                   | November 2017   | 33.35275° S, 20.42553° E  | 2           | Stagnant pool in dry mountain stream on farm  |
| <b>Hermanus</b> , Western Cape                                     | June 2017       | 34.370157° S, 19.25705° E | 7           | Vegetated dam in urban area                   |
| Jacana Estate, <b>White River</b> , Mpumalanga                     | April 2017      | 25.33909° S, 31.02255° E  | 8           | Vegetated shallow dam in peri-urban           |

| Site                                                           | Collection date               | Coordinates                                                   | Sample size | Habitat                                                     |
|----------------------------------------------------------------|-------------------------------|---------------------------------------------------------------|-------------|-------------------------------------------------------------|
| Province                                                       |                               |                                                               |             | area                                                        |
| Letsitele, <b>Tzaneen</b> , Limpopo Province                   | May 2017                      | 23.76933° S,<br>30.195127° E<br>33.57135° S,                  | 10          | Ornamental garden pond on farm                              |
| Loekiesfontein Farm, <b>Wellington</b> , Western Cape          | November 2017                 | 18.8401° E;<br>33.55603° S,<br>18.84368° E                    | 8           | Dam on farm                                                 |
| <b>Louis Trichardt</b> , Limpopo Province                      | February 2019                 | 23.07283° S,<br>30.07105° E                                   | 8           | Stagnant pool in river on farm                              |
| Morgenzon Farm, <b>Hopetown</b> , Northern Cape                | December 2017                 | 29.58477° S,<br>24.01435° E                                   | 7           | Inundated grass caused by flow from crop irrigation on farm |
| Nonpareil Farm, <b>Verkykerskop</b> , Free State               | January 2018                  | 27.783264° S,<br>29.33627° E                                  | 7           | Ornamental garden pond on farm                              |
| Placidus Farm, <b>Modimolle</b> , Limpopo Province             | April 2017                    | 24.43836° S,<br>28.4369° E                                    | 6           | Ornamental garden pond on farm                              |
| <b>Potchefstroom</b> , North-West Province                     | March 2017                    | 26.75549° S,<br>26.050598° E                                  | 9           | Vlei in peri-urban area                                     |
| Riverstone Game Farm, <b>Riversdale</b> , Western Cape         | November 2017                 | 33.70331° S,<br>21.17617° E                                   | 5           | Pool in river on farm                                       |
| Rondepan, Vencor, <b>Polokwane</b> , Limpopo Province          | April 2017                    | 23.76933° S,<br>29.40465° E                                   | 7           | Dam in inundated grass caused by flow from abattoir         |
| Roodepoort, <b>Johannesburg</b> , Gauteng                      | February 2018                 | 26.125111° S,<br>27.922216° E<br>33.92638° S,<br>20.59174° E; | 6           | Dam in peri-urban area                                      |
| Sandrivier Farm, <b>Barrydale</b> , Western Cape               | November 2017                 | 33.92834° S,<br>20.59153° E;<br>33.93128° S,<br>20.58732° E   | 9           | Farm dams and connecting river                              |
| Tasselberry, <b>White River</b> , Mpumalanga Province          | May 2017                      | 25.33197° S,<br>31.04329° E                                   | 6           | Ornamental garden pond in peri-urban area                   |
| Three Sisters Guest Farm, <b>Three Sisters</b> , Northern Cape | November 2017                 | 31.89501° S,<br>23.09568° E                                   | 5           | Ornamental garden pond on farm                              |
| Twееfontein Farm, <b>Colesberg</b> , Northern Cape             | December 2017                 | 30.93843° S,<br>25.50022° E                                   | 5           | Swimming pool on farm                                       |
| Voorbaat Farm, <b>Ladismith</b> , Western Cape                 | November 2017                 | 33.46372° S,<br>21.09696° E                                   | 6           | Vegetated dam in mountain stream on farm                    |
| Wakefield, <b>Howick</b> , KwaZulu Natal                       | February 2018 &<br>April 2019 | 29.47973° S,<br>29.88769° E                                   | 8           | Pools in vlei on farm                                       |

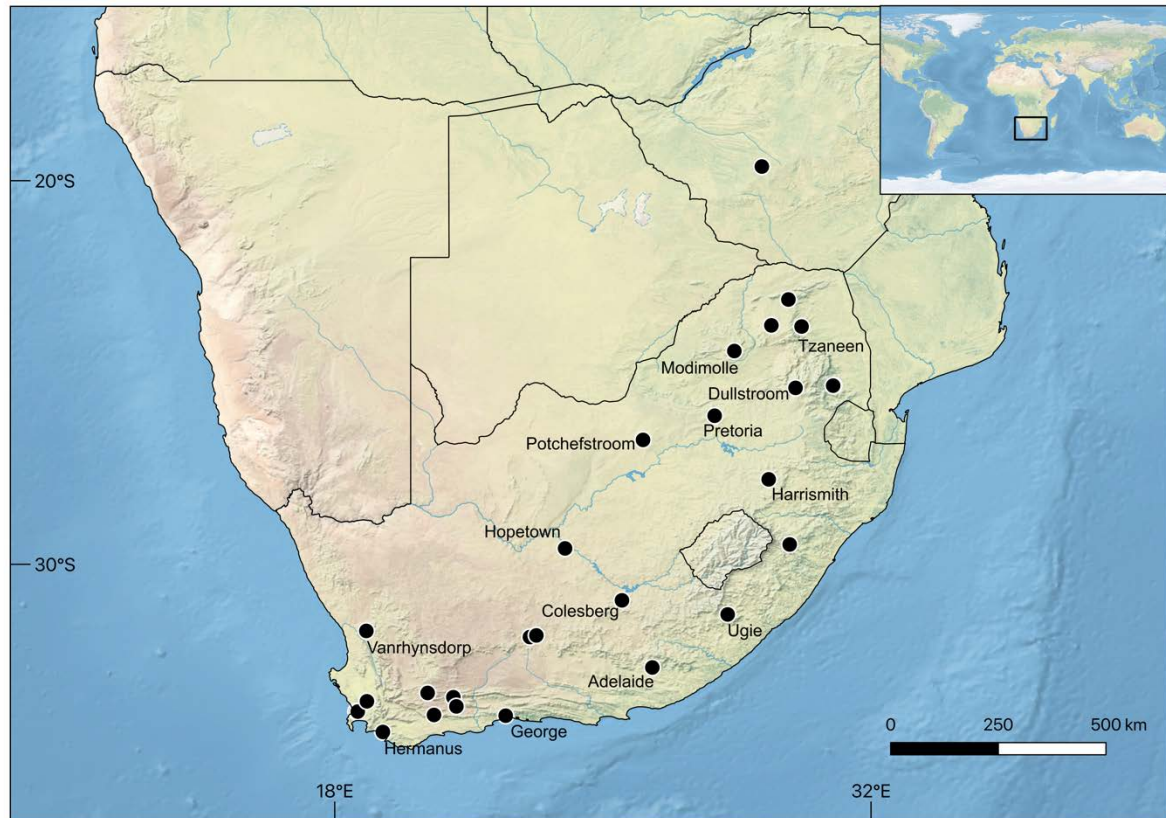

**Supplementary Figure S1:** Distribution of the 28 localities (black dots) where *Xenopus laevis* was collected in southern Africa for this study, as explained in Supplementary Table S1. Key city and town names are indicated on the map. Maps utilise the Mercator projection and were created in QGIS 3.4.3 Madeira based upon the *Natural Earth* public domain map.
